# Supplementary material for: Using a Novel MicroRNA Delivery System to Inhibit Osteoclastogenesis
Source: MDPI journal article supplement (doi:10.3390/ijms16048337), 2015-04-14
Supplement: s1 [file s1]

# Supplementary Information

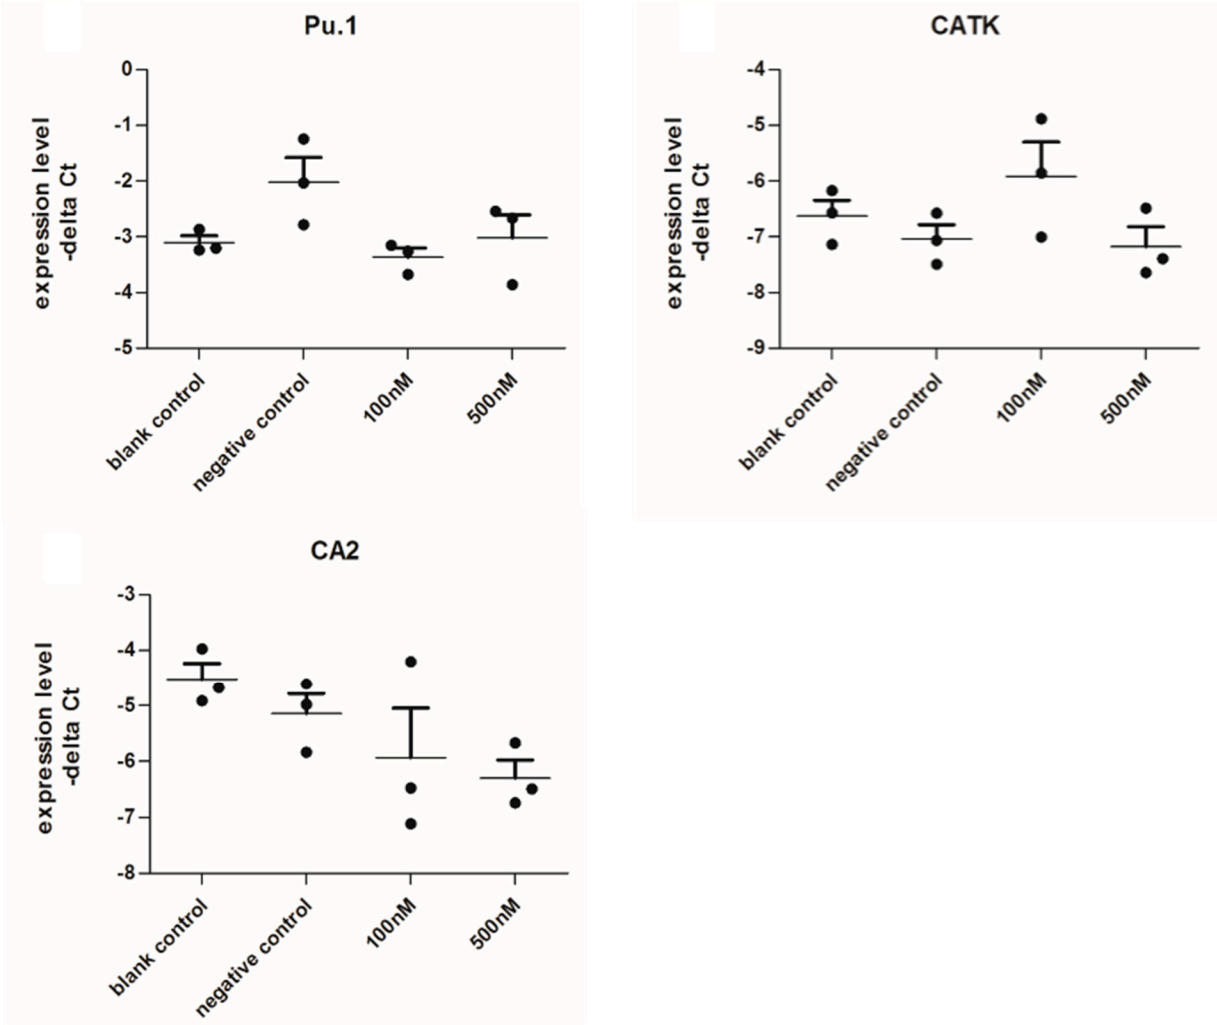

**Figure S1.** The expression level of osteocalst specified genes after 3 days incubation.
